# Supplementary material for: Research on Enrichment of P2O5 from Low-Grade Carbonaceous Phosphate Ore via Organic Acid Solution
Source: J Anal Methods Chem. 2019 Feb 3;2019:9859580. doi: 10.1155/2019/9859580 (PMC6377978; doi:10.1155/2019/9859580)
Supplement: Supplementary 2 — This file is the sample chemical element analysis file provided by ALS Chemex company. This file provides the content information of most trace elements and most constant elements. In this paper, only part of the data information of “gl2-3 (raw ore)” sample in this file is used. [file 9859580.f2.xls]

## Sheet: GZ15135139- Reported
Experiment number	Method code	ME-MS61	ME-MS61	ME-MS61	ME-MS61	ME-MS61	ME-MS61	ME-MS61	ME-MS61	ME-MS61	ME-MS61	ME-MS61	ME-MS61	ME-MS61	ME-MS61	ME-MS61	ME-MS61	ME-MS61	ME-MS61	ME-MS61	ME-MS61	ME-MS61	ME-MS61	ME-MS61	ME-MS61	ME-MS61	ME-MS61	ME-MS61	ME-MS61	ME-MS61	ME-MS61	ME-MS61	ME-MS61	ME-MS61	ME-MS61	ME-MS61	ME-MS61	ME-MS61	ME-MS61	ME-MS61	ME-MS61	ME-MS61	ME-MS61	ME-MS61	ME-MS61	ME-MS61	ME-MS61	ME-MS61	ME-MS61
	Test items	Ag	Al	As	Ba	Be	Bi	Ca	Cd	Ce	Co	Cr	Cs	Cu	Fe	Ga	Ge	Hf	In	K	La	Li	Mg	Mn	Mo	Na	Nb	Ni	P	Pb	Rb	Re	S	Sb	Sc	Se	Sn	Sr	Ta	Te	Th	Ti	Tl	U	V	W	Y	Zn	Zr
	unit	μg/g	%	μg/g	μg/g	μg/g	μg/g	%	μg/g	μg/g	μg/g	μg/g	μg/g	μg/g	%	μg/g	μg/g	μg/g	μg/g	%	μg/g	μg/g	%	μg/g	μg/g	%	μg/g	μg/g	μg/g	μg/g	μg/g	μg/g	%	μg/g	μg/g	μg/g	μg/g	μg/g	μg/g	μg/g	μg/g	%	μg/g	μg/g	μg/g	μg/g	μg/g	μg/g	μg/g
	The detection limit	0.01	0.01	0.2	10	0.05	0.01	0.01	0.02	0.01	0.1	1	0.05	0.2	0.01	0.05	0.05	0.1	0.005	0.01	0.5	0.2	0.01	5	0.05	0.01	0.1	0.2	10	0.5	0.1	0.002	0.01	0.05	0.1	1	0.2	0.2	0.05	0.05	0.2	0.005	0.02	0.1	1	0.1	0.1	2	0.5
sample number
1	JD-A （II）	0.14	0.43	26.7	600	1.36	0.05	28.4	0.04	24.9	3.2	14	0.53	4.8	0.88	2.44	0.06	0.2	0.013	0.18	39.1	4.9	0.62	1220	9.69	0.09	1.1	5.2	>10000	59.4	6.6	0.002	0.09	2.85	1.8	1	0.5	611	0.05	<0.05	1.9	0.024	0.51	12.6	20	0.7	89.2	8	4.9
2	GL2-3（dross）	2	0.23	6.3	440	1.17	0.02	28.3	0.03	237	0.9	8	0.17	20.5	0.25	2.6	0.36	0.3	0.007	0.11	339	8.1	0.05	22	0.65	0.09	0.7	0.7	>10000	472	3.2	0.004	0.08	5.7	3.2	5	0.2	1005	0.07	0.14	4.5	0.021	0.07	8.7	17	34.4	480	25	4
3	GL2-3（raw ore）	0.9	0.12	3.9	330	0.85	0.01	24.3	0.07	109	2.2	5	0.09	18.4	0.24	1.64	0.18	0.2	0.009	0.06	177	5.1	5.56	406	0.13	0.05	0.4	0.4	>10000	264	1.7	0.003	0.02	3.82	2.4	3	0.3	565	<0.05	0.09	2.1	0.012	0.07	5.4	13	19.5	262	27	6.1
[truncated: 47 more columns]
